# Supplementary material for: Impact of Doximity Residency Navigator on Graduate Medical Education Recruitment
Source: PubMed Central journal article supplement — Mayo Clin Proc Innov Qual Outcomes. 2018 Mar 14;2(2):113–8. doi: 10.1016/j.mayocpiqo.2018.01.006 (PMC6124342; doi:10.1016/j.mayocpiqo.2018.01.006), 2018-03-14
Supplement: mmc1.pdf [file mmc1.pdf]

**APPENDIX 1:****Demographic Information**

1. What type of medical school do you attend?
  - a. US Based Allopathic Medical School
  - b. US Based Osteopathic Medical School
  - c. International Medical School
2. What is your sex?
  - a. Male
  - b. Female
3. What is your age?
  - a. Enter number (10-100)
4. To which specialty did you apply? {Select all that apply}
  - a. Anesthesiology
  - b. Child Neurology
  - c. Dermatology
  - d. Emergency Medicine
  - e. Family Medicine
  - f. Internal Medicine
  - g. Medical Genetics
  - h. Medicine/Pediatrics
  - i. Neurological Surgery
  - j. Neurology
  - k. Nuclear Medicine
  - l. Obstetrics & Gynecology
  - m. Ophthalmology
  - n. Orthopedic Surgery
  - o. Otolaryngology
  - p. Pathology
  - q. Pediatrics
  - r. Physical Medicine and Rehabilitation
  - s. Plastic Surgery
  - t. Preventative Medicine
  - u. Psychiatry
  - v. Radiation Oncology
  - w. Radiology
  - x. Surgery
  - y. Thoracic Surgery
  - z. Urology

- aa. Vascular Surgery
- bb. Other {may write in response}

### **Residency Program Selection**

1. How many residency programs did you apply to?
  - a. 1-5
  - b. 6-10
  - c. 11-20
  - d. 21-30
  - e. 31-40
  - f. 41-50
  - g.  $\geq 51$

### **Applicant Utilization of Doximity**

1. Did you use *Doximity Residency Navigator* as a reference during your residency application process?
  - a. Yes
  - b. No
    - i. If yes, follow-up questions:**
      1. How did you learn about Doximity? {Select all that apply}
        - a. Friend or Colleague
        - b. Medical school recommendation, i.e. administration, advisor, interest group
        - c. Residency program advertisement
        - d. Social media
        - e. Other {may write in response}
      2. When did you access Doximity Residency Navigator? {Select all that apply}
        - a. Prior to sending out my application
        - b. During the interview process
        - c. While making my match list
    - ii. If no, follow-up questions:**
      1. Why did you choose *not* to utilize Doximity Residency Navigator?
        - a. I was not aware of Doximity Residency Navigator
        - b. Doximity Residency Navigator did not have information related to my specialty
        - c. Doximity Residency Navigator did not have information related to the residency programs I applied to

- d. I did not find the information on Doximity Residency Navigator valuable
  - e. Other {may write in response}
2. What references did you utilize to research residency programs?  
{Select all that apply}
- a. AAMC resources
  - b. AMA resources, i.e. FRIEDA online®, AMA Residency and Fellowship Database™
  - c. NRMP resources
  - d. Student Doctor Network
  - e. Medscape
  - f. Individual residency program websites
  - g. Social media
  - h. Other online or print resources
  - i. Other {may write in response}
2. What features available in Doximity did you find *valuable* in guiding your residency selection?
- a. {Likert 4-point scale} 1: Not valuable, 2: Slightly valuable, 3: Valuable, 4: Very valuable, \*N/A=I was unaware of this feature.

| <b>Doximity Feature</b>                                                                             | <b>1</b> | <b>2</b> | <b>3</b> | <b>4</b> | <b>N/A*</b> |
|-----------------------------------------------------------------------------------------------------|----------|----------|----------|----------|-------------|
| Reputation Rankings                                                                                 |          |          |          |          |             |
| Research Output Rankings                                                                            |          |          |          |          |             |
| Star Rankings                                                                                       |          |          |          |          |             |
| Program Characteristics and Setting, i.e. Large Public Hospital, VA, Pediatric, AOA Dual Accredited |          |          |          |          |             |
| Training Environment, i.e. Rural, Urban                                                             |          |          |          |          |             |
| Comparison of Residency size                                                                        |          |          |          |          |             |
| Geographic Comparison, i.e. by Region or State                                                      |          |          |          |          |             |

|                                                                                      |  |  |  |  |  |
|--------------------------------------------------------------------------------------|--|--|--|--|--|
| Intended Fellowship                                                                  |  |  |  |  |  |
| Board Certification                                                                  |  |  |  |  |  |
| Sub-specialization of Faculty                                                        |  |  |  |  |  |
| Alumni Publication Percentile                                                        |  |  |  |  |  |
| Alumni Clinical Trial Percentile                                                     |  |  |  |  |  |
| Residency Program Contact Information, i.e. Program director and Program coordinator |  |  |  |  |  |
| Gender Balance                                                                       |  |  |  |  |  |
| Top Feeder Medical Schools                                                           |  |  |  |  |  |
| Alumni Satisfaction Scores                                                           |  |  |  |  |  |
| Alumni Comments                                                                      |  |  |  |  |  |
| Alumni Map Feature                                                                   |  |  |  |  |  |
| Alumni List                                                                          |  |  |  |  |  |
| Current Resident List                                                                |  |  |  |  |  |

### **Residency Program Application**

1. Did Doximity **reputation rankings** influence your *application* to residency programs?
  - a. Yes, I applied or chose *not* to apply to residency programs based on Doximity reputation rankings
  - b. No, Doximity reputation rankings did *not* influence my decision to apply to residency programs

**Residency Program Interviews**

1. Did Doximity **reputation rankings** influence whether you accepted or declined *interviews* to residency programs?
  - a. Yes, I chose to attend or *not* attend at least one interview based on Doximity reputation rankings
  - b. No, Doximity reputation rankings did *not* influence my decision to accept or decline residency interviews

**Residency Program Match List Ranking**

1. Did Doximity **reputation rankings** influence your *match list ranking* of residency programs?
  - a. Yes, I moved residency programs up or down on my rank list based on Doximity reputation rankings
  - b. No, Doximity reputation rankings did not influence my rank list decisions

**Reputation Rankings Summary**

1. Did you match into a residency in the 2016-2017 NRMP match?
  - a. Yes
  - b. No
    - i. **If yes, follow-up questions:**
      1. Do you believe the use of Doximity helped you match successfully into a residency program?
        - a. Yes
        - b. No
      2. Did the use of Doximity expand your geographic options of residency programs?
        - a. Yes
        - b. No
2. Overall, how *accurate* do you believe the Doximity *reputation rankings* are?
  - a. Very accurate
  - b. Accurate
  - c. Slightly accurate
  - d. Not accurate
